# Supplementary material for: Integrated top-down and bottom-up mass spectrometry enables precise characterization of proteoforms and their post-translational modifications within the protein corona
Source: Research Square preprint supplement (doi:10.21203/rs.3.rs-7593385/v1), 2025-09-16
Supplement: Supplementary file 1 [file 4db32d014935f0482ccdccf7.docx]

**Supporting Information**

**Integrated top-down and bottom-up mass spectrometry enables precise characterization of proteoforms and their post-translational modifications within the protein corona**

Seyed Amirhossein Sadeghi1, Kun Li2, Yifan Yue1, Reyhane Tabatabaeian Nimavard1, Shaun Grumelot3,4, Amir Ata Saei5, Hojatollah Vali6,7, Fei Fang1, Xiaowen Liu2,*, Morteza Mahmoudi3,4*, and Liangliang Sun1,*

1Department of Chemistry, Michigan State University, East Lansing, MI, USA.

2Deming Department of Medicine, Tulane University, New Orleans, Louisiana 70112, United States.

3Precision Health Program, Michigan State University, East Lansing, MI, USA.

4Department of Radiology, College of Human Medicine, Michigan State University, East Lansing, MI, USA.

5Department of Microbiology, Tumor and Cell Biology, Karolinska Institute, Stockholm 171 77, Sweden

6Department of Anatomy and Cell Biology, McGill University, Montreal, QC, H3A 0C7, Canada

7Facility for Electron Microscopy Research, McGill University, Montreal, QC, H3A 0C7, Canada

* Corresponding authors: (XL) email: [xwliu@tulane.edu](mailto:xwliu@tulane.edu); (MM) email: [mahmou22@msu.edu](mailto:mahmou22@msu.edu); (LS) email: [lsun@chemistry.msu.edu](mailto:lsun@chemistry.msu.edu)

**Methods**

**Chemicals and materials**

TPCK-treated trypsin, ammonium bicarbonate (ABC), dithiothreitol (DTT), iodoacetamide (IAA), acrylamide, 3-(Trimethoxysilyl) propyl methacrylate, and Amicon Ultra centrifugal filter units (0.5 mL, 10 kDa cutoff) were purchased from Sigma-Aldrich. LC/MS-grade water, acetonitrile (ACN), HPLC-grade acetic acid, and fused silica capillaries (75 µm ID, 360 µm OD) and (50 µm ID, 360 µm OD) were obtained from Fisher Scientific. Plain polystyrene nanoparticles (PSNPs, ~100 nm) were purchased from Polysciences. Human plasma samples were received from Van Andel Institute. The samples were collected under the approval of Van Andel Institutional review board and were processed under an approved standard operating procedure.

**Preparation of protein corona**

Protein coronas were formed on PSNPs using a modified protocol1. In brief, 75 µL of NPs (25 mg/mL) were incubated with 1 mL of 55% human plasma at 37 °C for 1 hour under gentle stirring. Following incubation, samples were centrifuged at 14,000 xg for 20 minutes to remove unbound proteins. The resulting NP–protein complexes were washed twice with cold PBS and collected as pellets for mass spectrometry analysis.

**Sample preparation for BUP**

One-third of the protein corona–coated PSNPs (~70 µg total protein), corresponding to each individual plasma sample (12 in total) and prepared as described above, were resuspended in 35 µL of 100 mM ABC buffer (pH 8.0) containing 8 M urea and denatured at 37 °C for 30 minutes. Proteins were reduced by adding 5 µL of 70 mM DTT and incubating at 37 °C for 30 minutes, followed by alkylation with 12.5 µL of 70 mM IAA in the dark at room temperature for 20 minutes. The reaction was quenched with 1 µL of 70 mM DTT. Samples were diluted 4-fold with 100 mM ABC and digested overnight at 37 °C with 1.5 µg of trypsin. Digestion was quenched by adding formic acid to a final concentration of 0.6% (v/v). Peptides were desalted using Sep-Pak C18 solid-phase extraction cartridges (Waters, Milford, MA), lyophilized using a vacuum concentrator, and then re-dissolved in 70 µL of 100 mM ABC buffer (pH 8.0).

**Sample preparation for TDP**
The intact protein corona was prepared according to our recently published paper2. In brief, two-third of protein–NP complexes corresponding to each individual plasma sample (12 in total) were subjected to elution condition to release the protein corona from the PSNPs. Corona-coated PSNPs were incubated in 1% (w/v) Sodium dodecyl sulfate (SDS) elution buffer for 3 hours at 60 °C under constant agitation. The supernatant containing the eluted proteins was separated via centrifugation at 19,000xg for 20 minutes at 15 °C, followed by a second centrifugation under the same conditions to ensure complete NP removal. The protein solution was then subjected to buffer exchange using Amicon Ultra centrifugal filters (10 kDa MWCO) to eliminate SDS.
The buffer exchange method initiated by pre-wetting the filter unit with 40 µL of 100 mM ABC (pH 8.0) and followed by centrifugation at 14,000xg for 10 minutes. Then, 200 µg of protein sample was added, followed by centrifugation for 20 minutes. To remove SDS, 200 µL of 8 M urea in 100 mM ABC was added and centrifuged at 14,000xg for 20 minutes, repeated twice. To eliminate residual urea, three additional rounds of buffer exchange were performed with 200 µL of 100 mM ABC, each followed by centrifugation at 15°C.
After buffer exchange, total protein concentration was determined using a BCA assay (Fisher Scientific) according to the manufacturer’s instructions. Samples were stored at 4 °C overnight. The final protein solution (60 µL of 100 mM ABC, 2.4 mg/mL) was used for Capillary zone electrophoresis CZE-MS/MS and Reversed-phase liquid chromatography (RPLC)-MS/MS analysis.

**TDP of protein corona**

**﻿CZE-MS/MS for TDP of protein corona**

Fused silica capillaries (50 µm inner diameter, 360 µm outer diameter) were coated with linear polyacrylamide (LPA) following previously established procedures3,4. After LPA coating, one end of separation capillary was etched with hydrofluoric acid, reducing the outer diameter to approximately 100 µm5.

Capillary electrophoresis (CE) was performed using an ECE-001 autosampler (CMP Scientific, Brooklyn, NY, USA), integrated with an Orbitrap Exploris 480 mass spectrometer (Thermo Fisher Scientific), employing a in-house-built electrokinetically pumped sheath-flow CE-MS nanospray interface6,7. A 1-meter-long fused silica capillary (50 µm inner diameter, 360 µm outer diameter) coated with linear polyacrylamide (LPA) was used for separation. The background electrolyte (BGE) consisted of 5% (v/v) acetic acid, adjusted to pH 2.4, while the sheath buffer was composed of 0.2% formic acid and 10% methanol (v/v) to support efficient electrospray ionization (ESI). Sample injection into the capillary was performed by applying pressure. The injection volume (~100 nL) was estimated using Poiseuille’s law, based on an injection pressure of 5 psi for 20 seconds through the 1-meter capillary. A dynamic pH junction was utilized to enhance stacking and improve separation. During CE separation, a voltage of 30 kV was applied at the inlet of the capillary, while an ESI voltage of 2.0–2.2 kV was applied via the sheath buffer reservoir to enable nanospray ionization. Borosilicate glass capillaries (1.0 mm outer diameter, 0.75 mm inner diameter, 10 cm length) were pulled into nanospray emitters using a Sutter P-1000 flaming/brown micropipette puller. The resulting emitters had tip openings ranging from 25 to 35 µm, suitable for stable electrospray performance.

MS was conducted using the Q-Exactive HF (Thermo Fisher Scientific) mass spectrometer in Data-dependent acquisition (DDA) mode. Full MS scans were acquired at a resolution of 120,000 (at m/z 200) with 3 microscans, covering the m/z range of 600–2000. Automatic gain control (AGC) was set to 3× 106, with the injection time set to 100 ms. Ions selected for MS/MS were isolated using a 2 m/z window and fragmented by higher-energy collisional dissociation (HCD) with a normalized collision energy (NCE) of 20%. Precursor selection was limited to ions with charge states more than +5 and intensities above 1 × 10⁴. Fragment ions were analyzed at a resolution of 60,000 (m/z 200) with a single microscan and an AGC target of 1 × 106. Dynamic exclusion was enabled (30 s duration, ±10 ppm mass tolerance), and isotope peaks were excluded from fragmentation.

**RPLC-MS/MS** **for TDP** **of protein corona**

RPLC was carried out using an EASY-nLC™ 1200 system (Thermo Fisher Scientific). For each run, a 1 µL aliquot of the protein corona sample (0.3 mg/mL) was loaded onto an in-house packed C4 capillary column (75 µm i.d. × 360 µm o.d., 20 cm length) containing 3 µm, 300 Å Bio-C4 particles (Sepax Technologies). Peptide separation was performed at a flow rate of 400 nL/min using a binary solvent system: mobile phase A was 2% acetonitrile (ACN) with 0.1% formic acid (FA) in water, and mobile phase B was 80% ACN with 0.1% FA.

The chromatographic gradient was programmed over 105 minutes as follows: 20% to 100% B from 0 to 60 minutes, followed by an isocratic hold at 100% B from 60 to 80 minutes. An additional 30 minutes per run was allocated for column equilibration and sample loading, resulting in a total run time of approximately 135 minutes per sample. Each sample was analyzed in triplicate to ensure reproducibility.

MS was conducted using the Q-Exactive HF (Thermo Fisher Scientific) instrument in Data-dependent acquisition (DDA) mode. Full MS scans were acquired at a resolution of 120,000 (at m/z 200) with 3 microscans, covering the m/z range of 600–2000. AGC was set to 1× 106, with the injection time set to 100 ms. Ions selected for MS/MS were isolated using a 2 m/z window and fragmented by HCD with a NCE of 20%. Precursor selection was limited to ions with charge states more than +3 and intensities above 5 × 10⁴. Fragment ions were analyzed at a resolution of 120,000 (m/z 200) with three microscans and an AGC target of 1 × 105 with the injection time set to 200 ms. Dynamic exclusion was enabled (30 s duration, ±10 ppm mass tolerance), and isotope peaks were excluded from fragmentation.

**BUP of protein corona**

Peptide separation was performed using an EASY-nLC™ 1200 system (Thermo Fisher Scientific) equipped with a home-packed C18 capillary column (75 µm inner diameter × 360 µm outer diameter, 23 cm in length; ReproSil-Pur 120 C18-AQ, 1.9 µm particles, 120 Å pore size). A 1 µL injection of the protein corona digest (0.4 mg/mL) was introduced, and separation was carried out at a flow rate of 200 nL/min. The mobile phase system consisted of solvent A (2% acetonitrile with 0.1% formic acid in water) and solvent B (80% acetonitrile with 0.1% formic acid).

A 115-minute gradient was used for elution as follows: 8–55% B from 0 to 85 minutes, ramping to 100% B by 95 minutes, and held at 100% B until 115 minutes. An additional 30 minutes was required for sample loading and column equilibration, resulting in a total run time of approximately 145 minutes per sample. Each analysis was performed in triplicate to ensure reproducibility.

Mass spectrometry was conducted on a Q-Exactive HF instrument (Thermo Fisher Scientific) operating in data-dependent acquisition (DDA) mode. Full MS scans were collected over an *m/z* range of 300–1800 at a resolution of 60,000 (at *m/z* 200). Ions with charge states more than +1 and intensities above 1× 105 were selected for MS/MS using higher-energy collisional dissociation (HCD) with a normalized collision energy (NCE) of 28%. Fragment ions were measured in the Orbitrap at a resolution of 60,000 using one microscan. Maximum injection times were set to 50 ms for MS and 100 ms for MS/MS scans. A 2 *m/z* isolation window was applied, with dynamic exclusion enabled for 30 seconds and isotope peaks excluded from selection.

**Off-line high pH RPLC peptide Fractionation of Peptide samples**

Approximately 600 µg of the combined peptide mixture from all 12 samples was subjected to high-pH reversed-phase liquid chromatography (RPLC) fractionation using a 1260 Infinity II HPLC system (Agilent Technologies, Santa Clara, CA). Peptide separation was carried out offline on a Poroshell 120 EC-C18 column (2.7 µm, 3 × 150 mm) at a flow rate of 0.2 mL/min. The mobile phases consisted of 5 mM ABC in water (mobile phase A) and 5 mM ABC in 80% ACN (mobile phase B), with both adjusted to pH 9 using ammonium hydroxide.

Peptides were separated using a 65-minute gradient: 40 fractions were collected during a linear increase from 5% to 55% B over 50 minutes, followed by 8 fractions from 55% to 100% B over 10 minutes, and 2 final fractions held at 100% B for 5 minutes. A total of 50 fractions were collected. All fractions were dried using a vacuum centrifuge (SpeedVac) and stored at −20 °C until further analysis by LC-MS/MS, following the same protocol described in the “Bup of protein corona” section.

**NP characterization**

The hydrodynamic diameter and surface charge of the PSNPs were meticulously evaluated both prior to and following the formation of the protein corona. These measurements were performed using a Zetasizer Nano Series instrument (Malvern Instruments), which integrates dynamic light scattering (DLS) and zeta potential analysis to provide comprehensive characterization. DLS measurements were carried out at ambient temperature (approximately 25°C) utilizing a 632 nm Helium-Neon laser, ensuring optimal stability and accuracy. The procedures included multiple replicates to ensure reproducibility and statistical reliability, allowing for precise assessment of particle size distribution and surface charge variations induced by the protein corona formation.

Cryo-EM sample preparation, 10 nm BSA-treated gold NPs were mixed with the corona-coated PSNPs at an optimal concentration, in a ratio of 1:4.3. Five microliters of this mixture were applied to glow-discharged holey carbon grids (C-Flat R2/2, Protochips, Inc.), blotted, and vitrified in liquid ethane using the Vitrobot Mark IV (Thermo Fisher Scientific, Hillsboro, OR, USA). Imaging was performed on a Titan Krios 300 kV cryo-electron microscope equipped with a Falcon 2 direct electron detector and phase plate (Thermo Fisher Scientific). Images were acquired at a nominal magnification of 75,000×, resulting in a pixel size of 1.075 Å, with defocus values ranging from −2.0 to −3.0 μm under low-dose conditions to minimize radiation damage.

**Cryo-electron tomography**

Single-axis cryo-electron tomograms were collected using the Titan Krios TEM (Thermo Fisher Scientific) operated at 300 kV and equipped with a Falcon 2 DED. Data acquisition was performed with FEI Batch Tomography Software. Tilt series were collected at 59,000× magnification over a tilt range of ±60°, with an angular increment of 2°. The nominal pixel size was 1.375 Å, and the defocus varied from −2 to −3 μm. The total dose per tomogram was approximately 80 electrons per Å² (e⁻/Å²).

**BUP database search and data analysis**

Bottom-up MS data were analyzed using two pipelines: FragPipe (v22.0) was employed for PTM identification, while MaxQuant (v1.5.5.1) was used for peptide and protein identification with label-free quantification (LFQ) based on database searching.

Using MaxQuant8, MS raw files were analyzed LFQ enabled. Data were searched against the UniProt human proteome database (UP000005640; 82,733 entries; version dated December 29, 2023). A decoy (reversed) database was used to estimate false discovery rates (FDR). The search parameters specified trypsin as the proteolytic enzyme, allowing up to two missed cleavages. Carbamidomethylation of cysteine residues was set as a fixed modification, while methionine oxidation, deamidation of asparagine/glutamine, and N-terminal acetylation were treated as variable modifications. Filtering criteria included a 1% FDR threshold at both the peptide-spectrum match (PSM) and protein group levels. All other parameters followed the software’s default settings. The full list of identified protein groups is available in **Supporting Information**. Subsequent data analysis was conducted using Perseus software (v2.0.10.0). Entries annotated as "Reverse," "Potential contaminant," or "Only identified by site" were excluded from downstream analysis. Volcano plots and heatmaps were generated using an S₀ value of 0.05 and an FDR of 0.1. Gene Ontology (GO) enrichment analysis was carried out via the DAVID Bioinformatics Resources (<https://david.ncifcrf.gov/>) using default parameters.

FragPipe pipeline was used for PTM identification by applying an open search strategy against the UniProt human proteome database (UP000005640; 82,733 entries; version dated December 29, 2023). A combined decoy and target database containing 165,466 entries was created in FragPipe pipeline for FDR estimation. Variable modifications included methionine oxidation (+15.9949 Da), N-terminal acetylation (+42.0106 Da), and phosphorylation on serine, threonine, and tyrosine (+79.96633 Da). Carbamidomethylation of cysteine was set as a fixed modification. The search allowed up to three variable modifications per peptide, and precursor mass shifts were permitted within a range of –150 to +500 Da, following the open search default configuration and the report mass shift as a variable mod was set to “No”.

Peptide-spectrum matches (PSMs) were filtered at a 1% FDR at the spectrum level. PSMs were subsequently grouped and filtered using a 1% FDR at the peptide level, and protein identifications were also filtered with a 1% FDR threshold.

**TDP database search and data analysis**

Proteoforms were identified and quantified using the TopPIC suite (version 1.7.8)9. Initially, raw mass spectrometry data files were converted to centroided mzML files using MSConvert (version 3.0)10. Spectral deconvolution, including the assignment of monoisotopic masses to precursor and fragment ions as well as feature detection, was performed using TopFD (version 1.7.8)11. The processed spectra and extracted proteoform features were saved in msalign and txt formats, respectively.

Database searching was conducted using TopPIC (version 1.7.8)9 against a custom protein database (7,576 sequences) composed of proteins identified in this study’s BUP analysis and from prior literature reports. The search allowed a single unexpected mass shift, with mass tolerances set to 10 ppm for both precursor and fragment ions. Unknown mass shifts were restricted to a maximum of 500 Da. A target-decoy approach was applied to estimate FDRs, with a 1% FDR cutoff at the spectrum-level and the proteoform level. A mass tolerance of 2.2 Da was used to group proteoform-spectrum-matches (PrSMs) into proteoform identifications. Identified proteoforms from all runs are provided in **Supporting Information**. Proteoform identifications reported from multiple fractions of the same sample were combined and redundant identifications were removed as follows: Two proteoforms were assigned to the same proteoform group if they were from the same protein and the difference between their precursor masses was less than 2.2 Da. For each proteoform group, only the proteoform with the best *E*-value was reported.

LFQ of proteoforms was carried out using TopDiff (version 1.7.8) with default parameters. Additionally, Xcalibur software (Thermo Fisher Scientific) was used to extract proteoform intensity and migration time data from complex samples. Electropherograms were exported from Xcalibur and finalized for presentation using Adobe Illustrator.

**Validation of PTMs and mass shifts in proteoforms and peptides**

The PTM-TBA pipeline (version 1.1)12 was employed to validate mass shifts and PTMs in proteoforms identified from top-down MS data and PTMs in peptides identified from bottom-up MS data. For bottom-up analysis, both two database search engines, MSFragger and Proteoform Discoverer (PD, version 2.2; against the UniProt human proteome database; UP000005640; 82,733 entries; version dated December 29, 2023) were used to identify mass shifts and PTMs in peptides and to validate mass shifts and PTMs in proteoforms identified from the top-down database searches. In the PD results, specified PTMs (oxidation, acetylation, methylation, succinylation, and phosphorylation) were extracted along with their associated mass shift values for comparison with top-down identifications. A mass shift *m*1 on a proteoform localized to a region starting from position *a*1 and ending at position *b*1 was matched to another mass shift *m*2 on a peptide of the same protein localized to region starting from position *a*2 and ending at position *b*2 if their localized regions overlapped [a1, *b*1] ⋂ [a2, *b*2]≠Ø and |*m*1 – *m*2| < *e* or 1.00235-*e* < |*m*1 – *m*2| < 1.00235 + *e*, where *e =* 0.1 is an error tolerance and 1.00235 Da tolerance is a common error in deconvoluted precursor masses in top-down MS. For each mass shift in proteoform identifications, PTM-TBA searched for a peptide identification with a matched mass shift/PTM. If multiple peptides with a matched mass shift were found, the peptide with the best *E*-value was reported. Similarly, PTM-TBA matched PTMs in identified proteoforms to PTMs in identified peptides for validation.


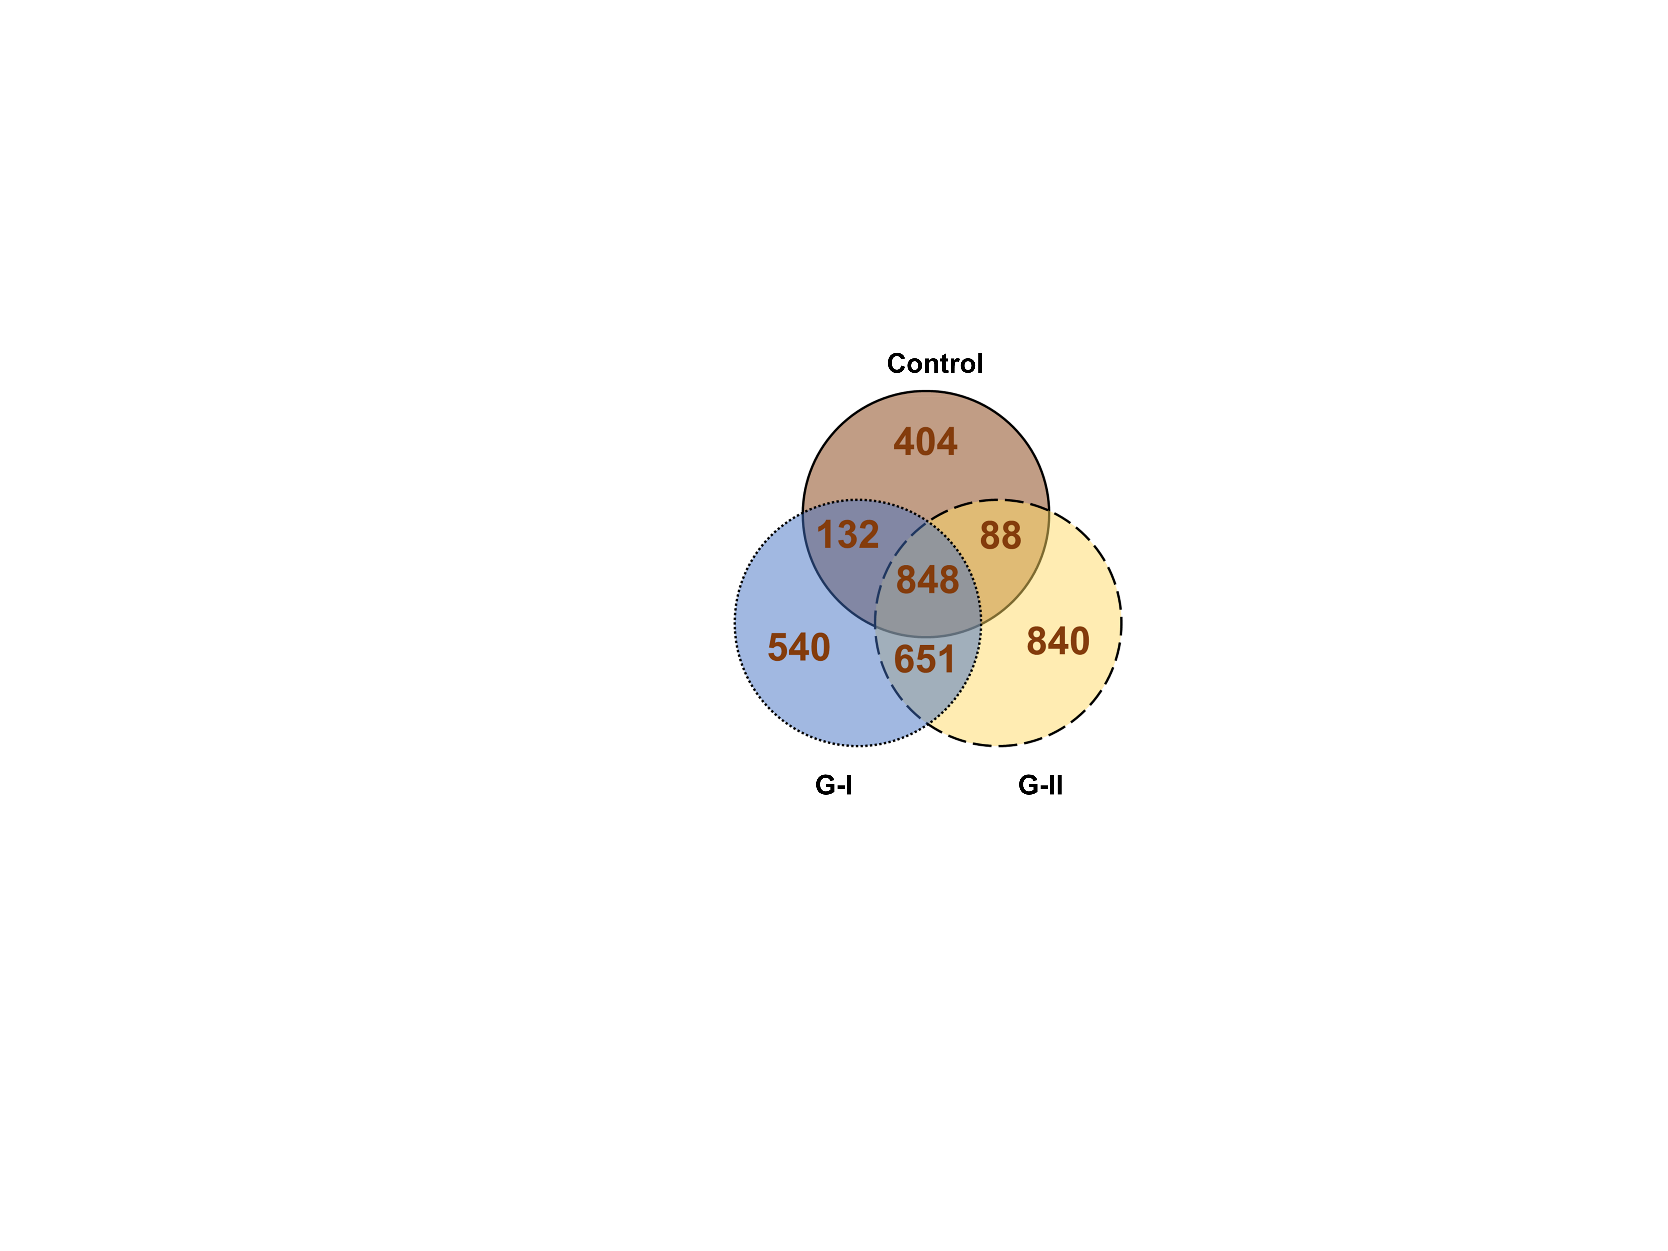


**Figure S1. Proteoform identifications (IDs) across different sample type.** Venn diagram illustrating the total number of unique and shared proteoforms identified across three different types of plasma samples (healthy control, breast cancer G-I, and breast cancer G-II).


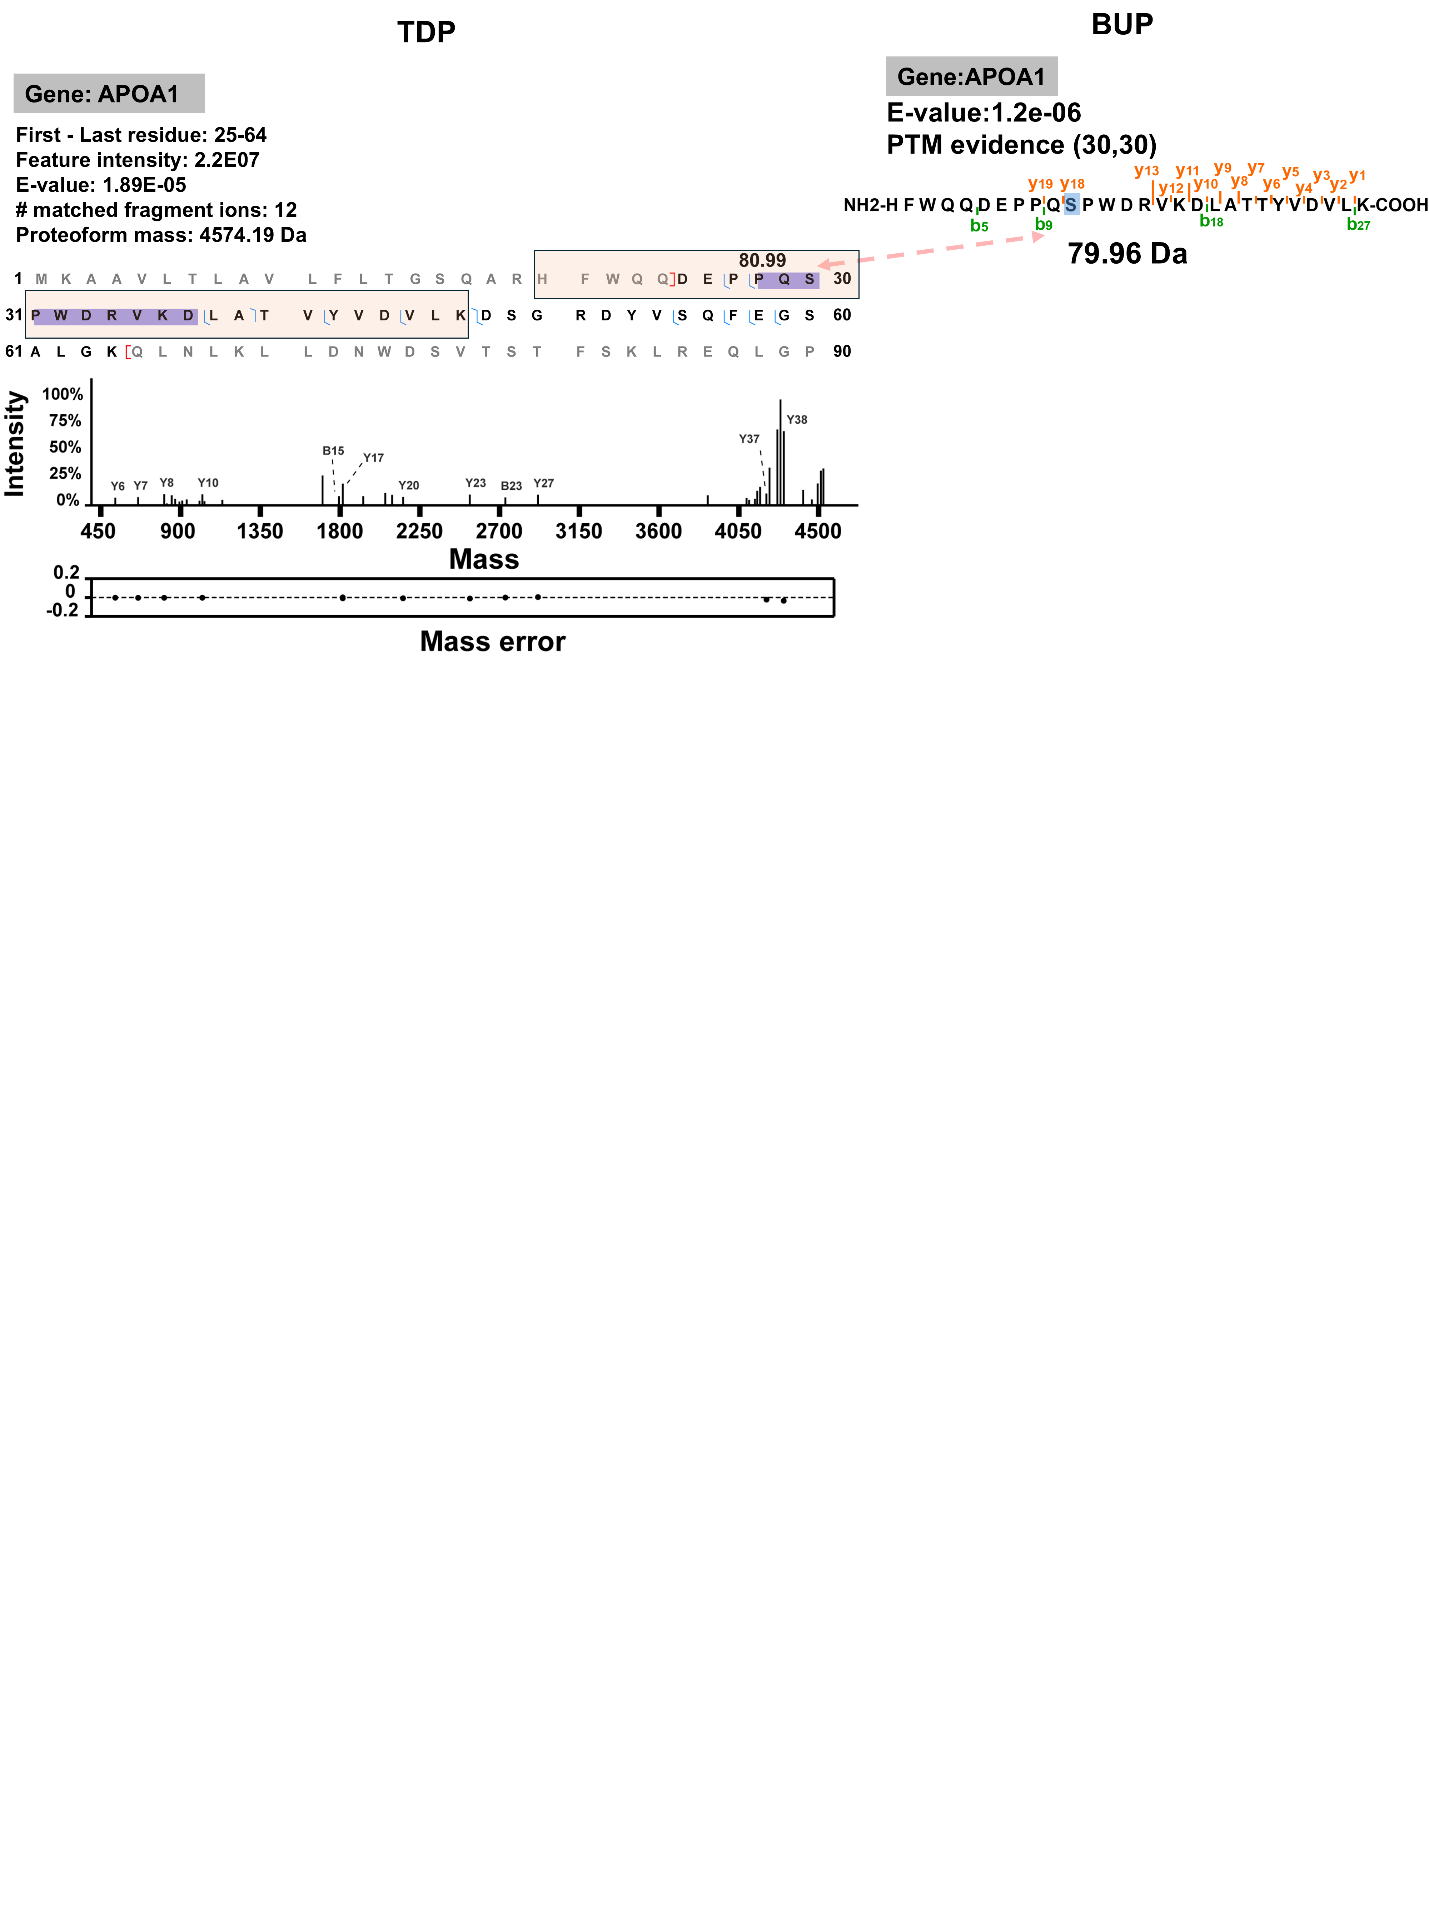


**Figure S2****.** Representative example of precise characterization of Phosphorylation on a proteoform from Apolipoprotein A-I (APOA1) using the combination of BUP and TDP data with the PTM-TBA pipeline.


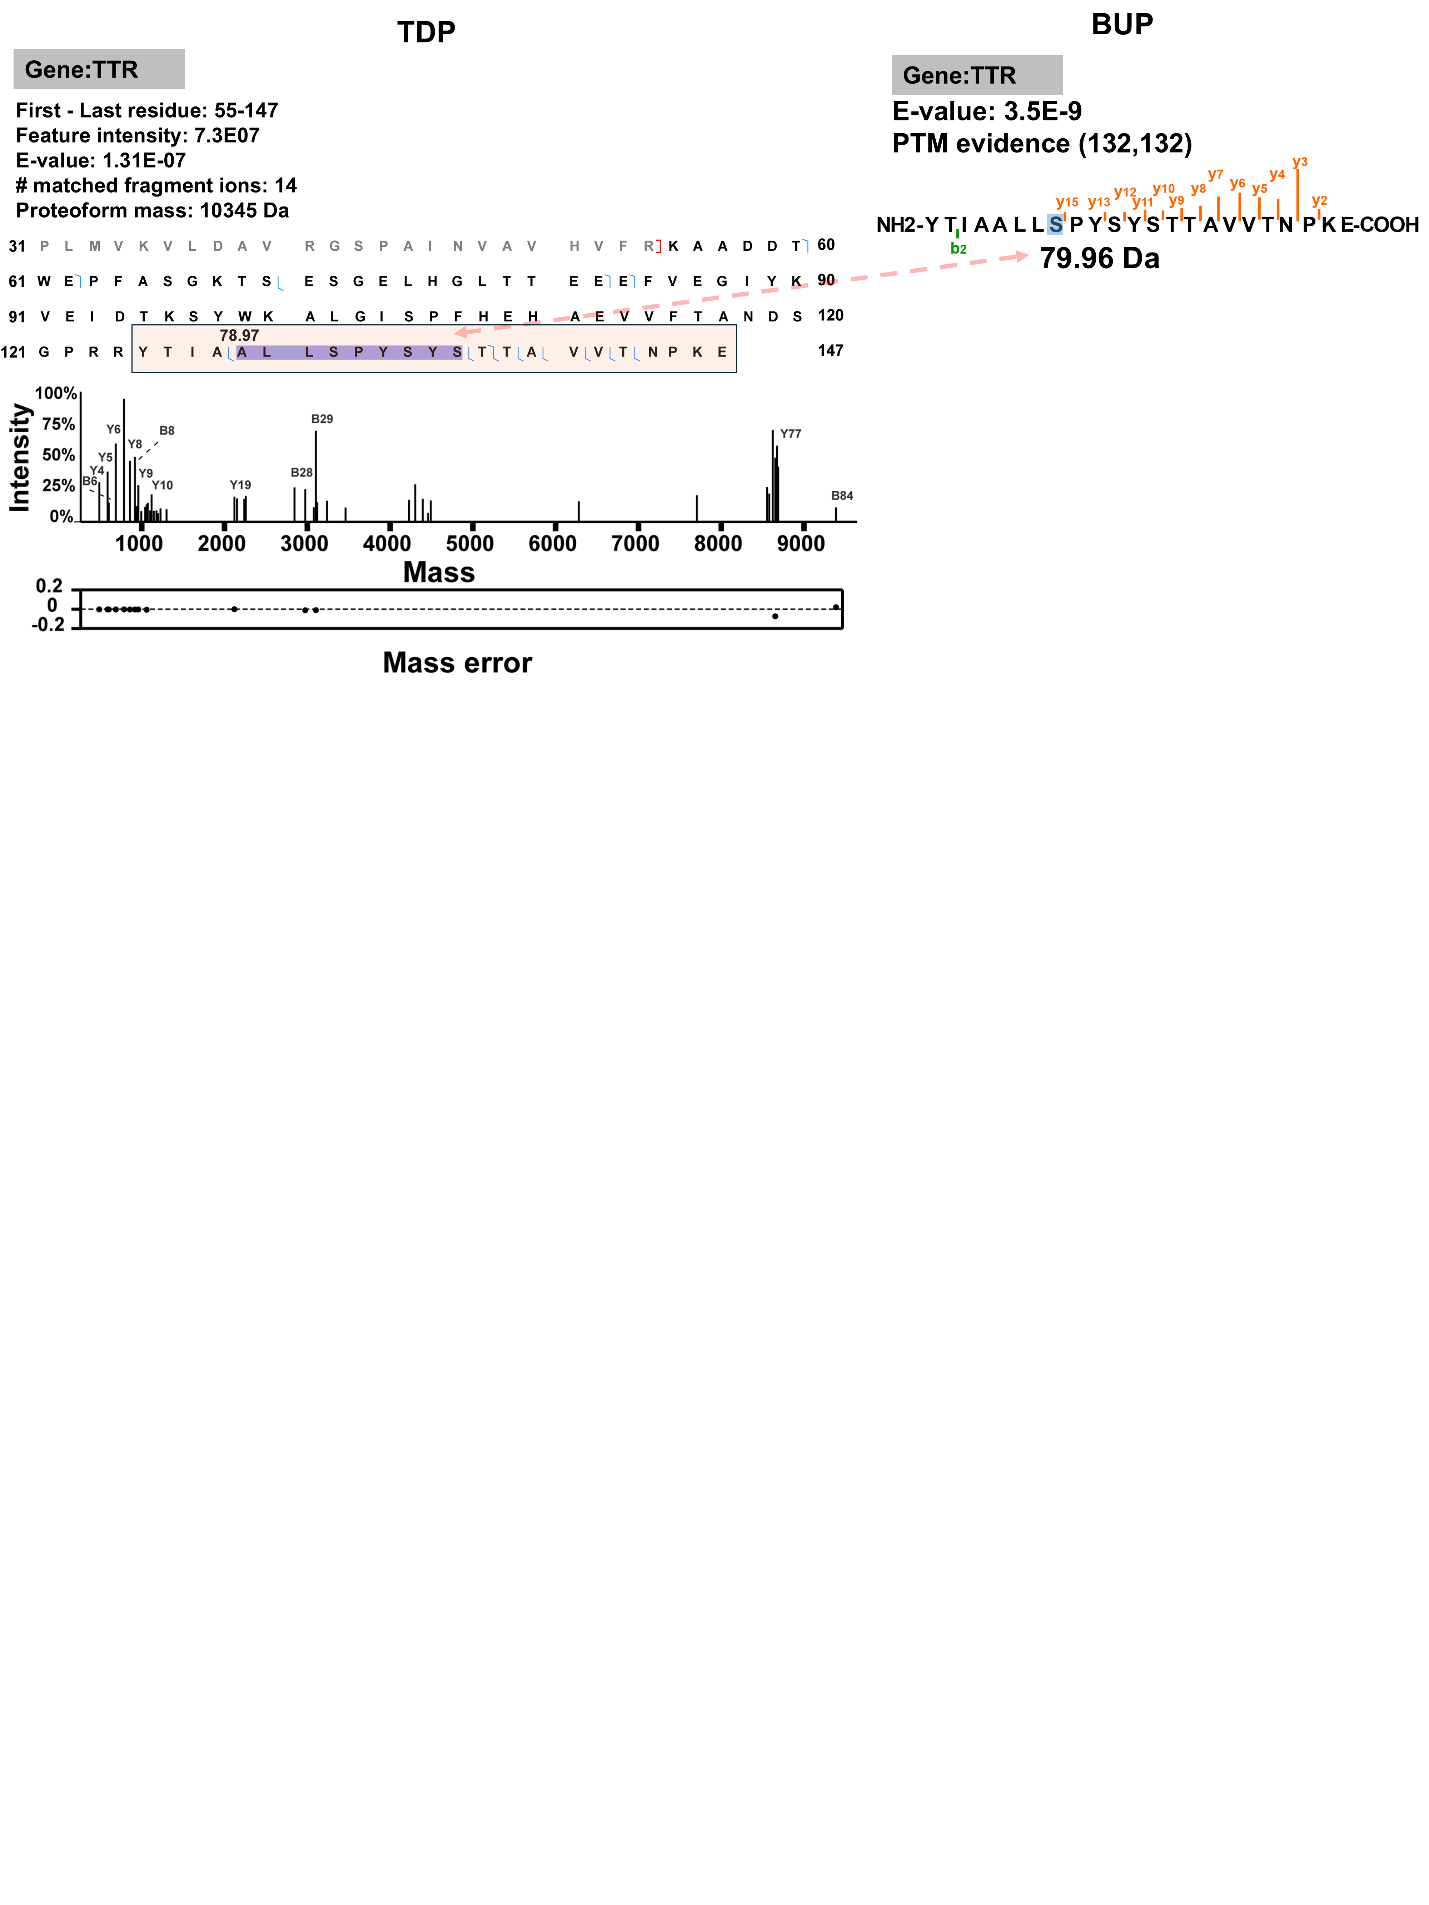


**Figure S3.** One more example of precise characterization of phosphorylation on a proteoform from Transthyretin (TTR) using the combination of BUP and TDP data with the PTM-TBA pipeline.


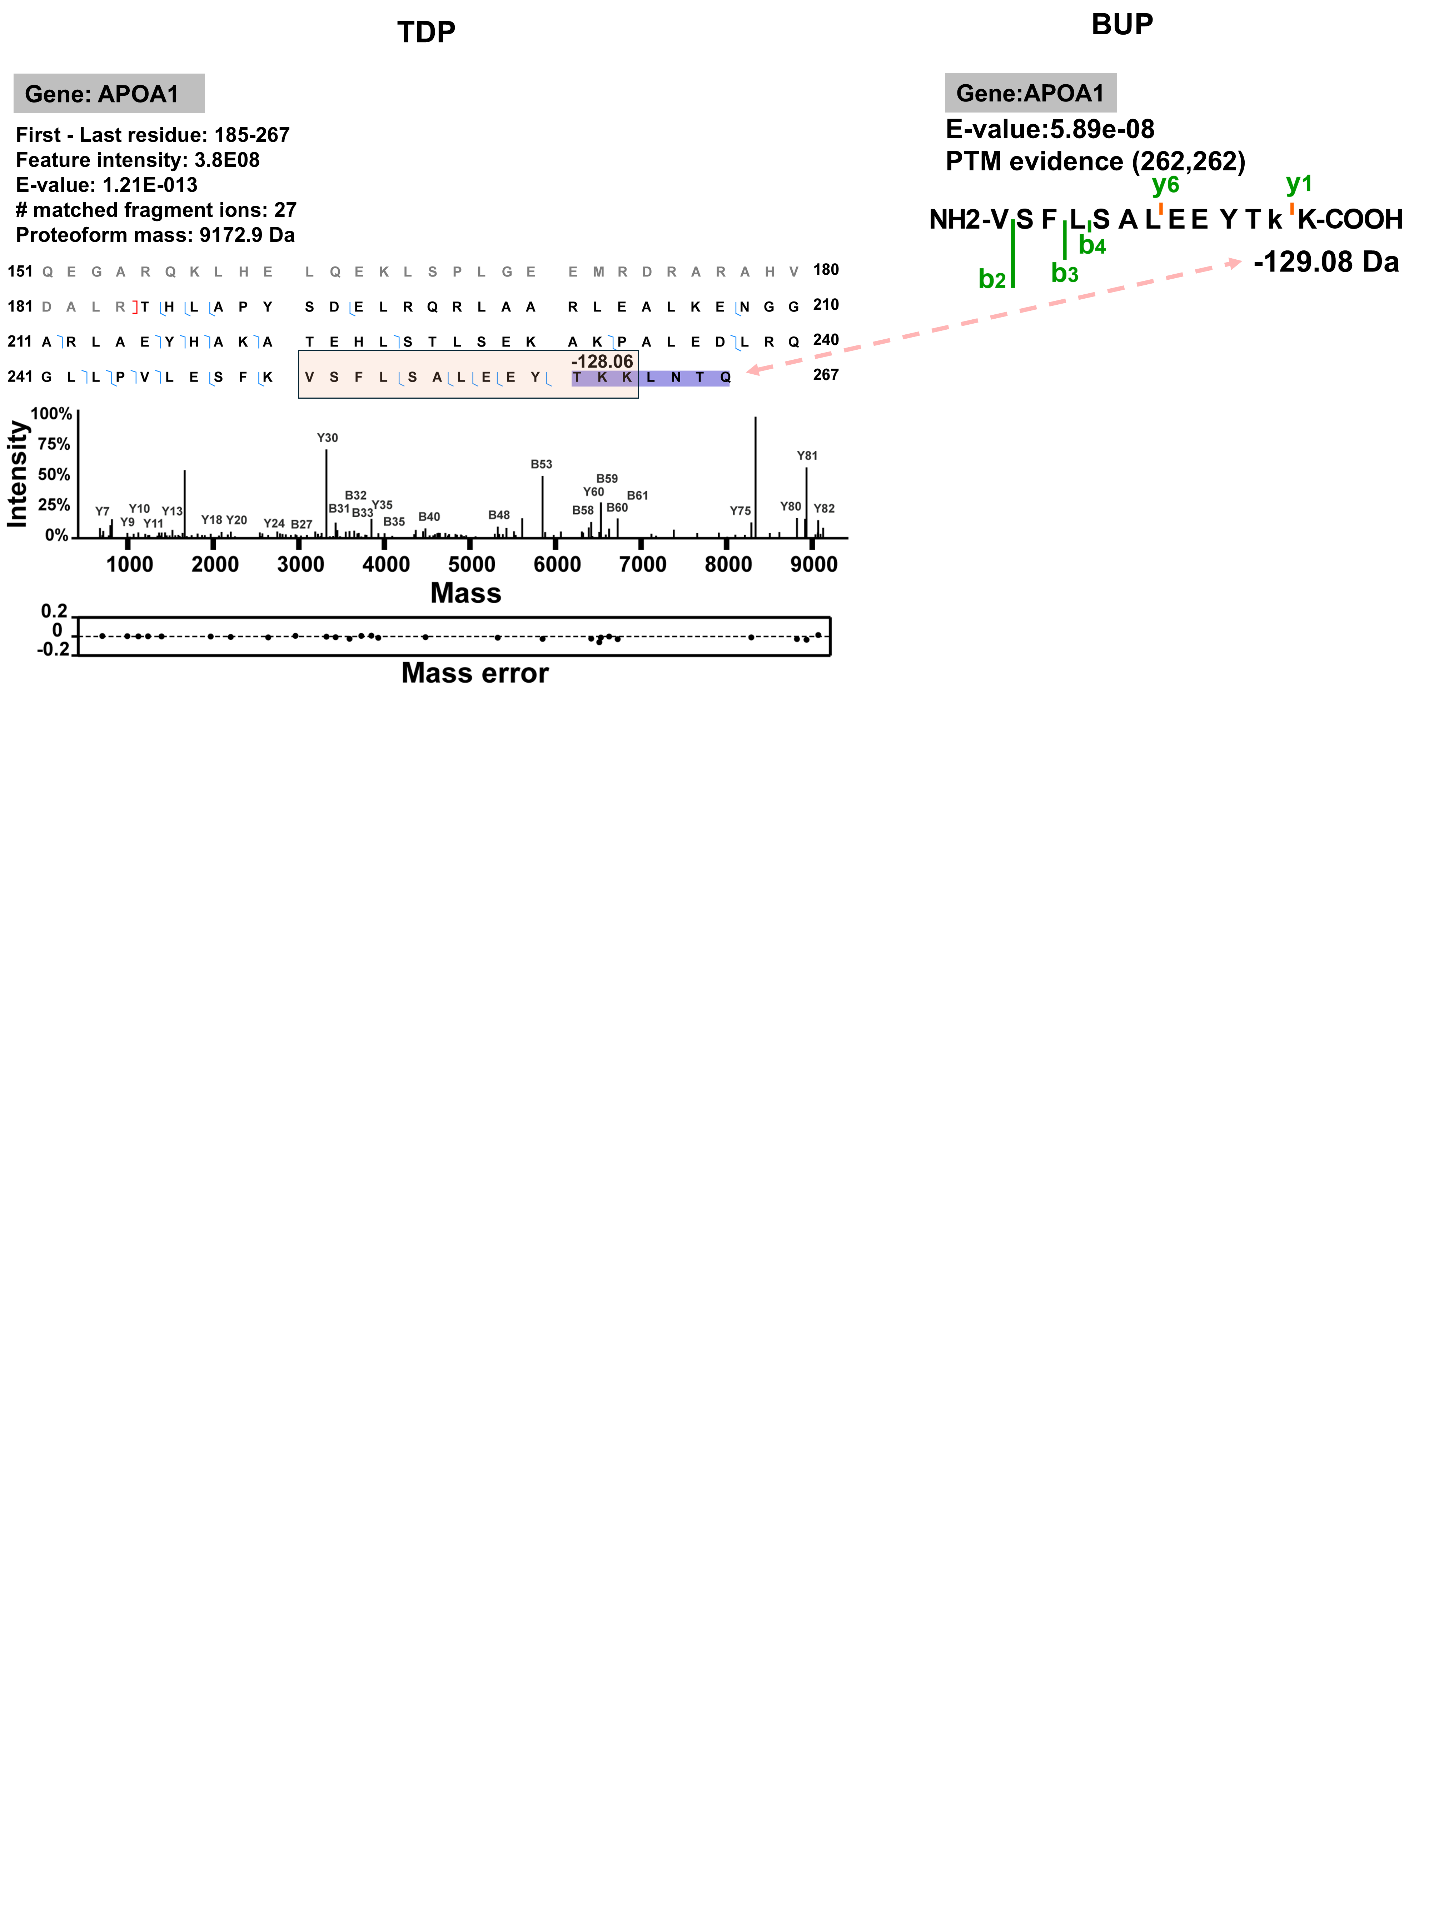


**Figure S4.** Representative example of precise characterization of a Lysine deletion on a proteoform from Apolipoprotein A-I (APOA1) using the combination of BUP and TDP data with the PTM-TBA pipeline.


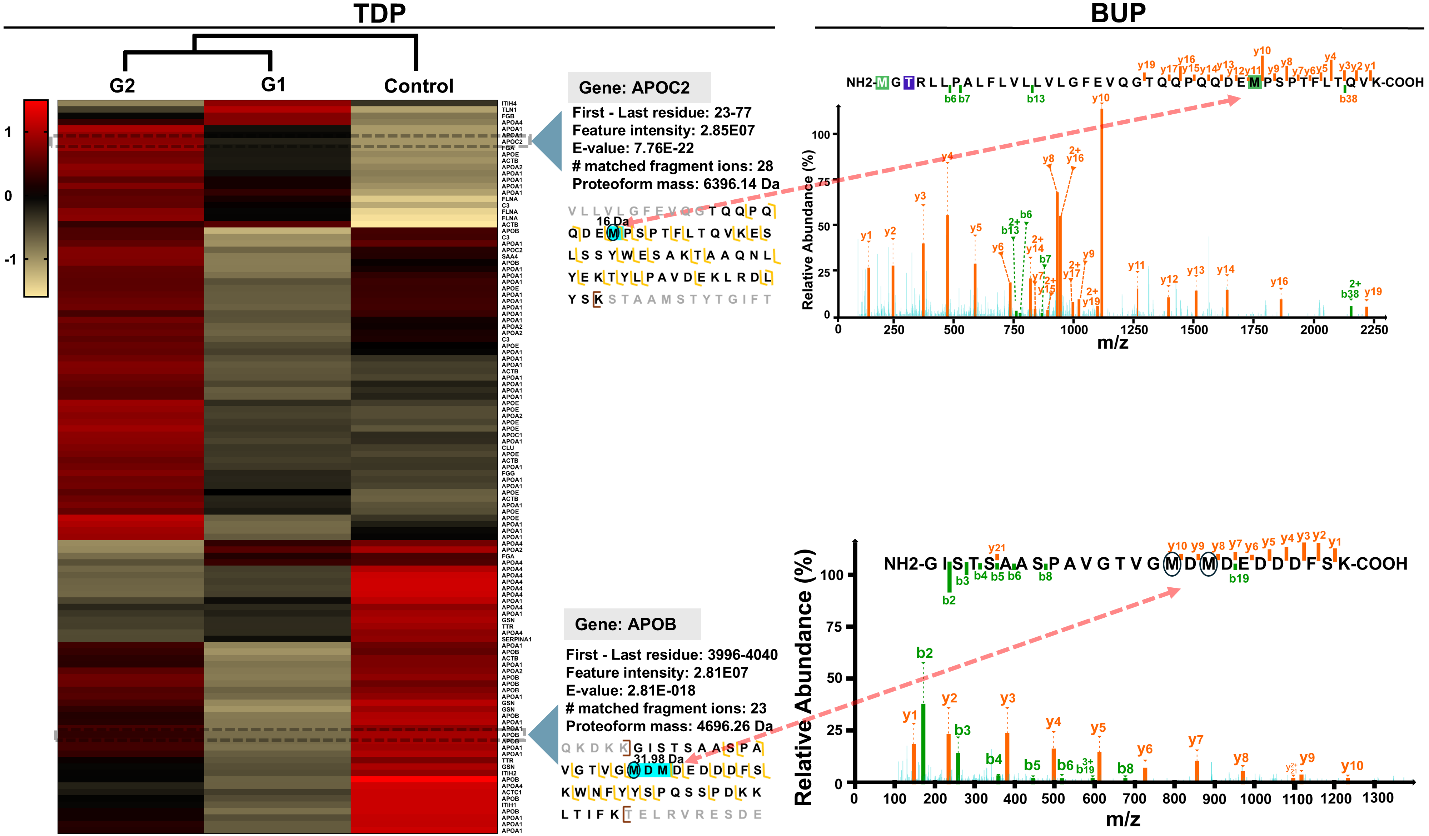


**Figure S5**. Differentially expressed proteoforms identified by RPLC–MS/MS. Heatmap and hierarchical clustering analysis reveal differentially expressed proteoforms across three sample groups (Healthy, Grade I, and Grade II) after normalization and ANOVA test to show statistically significant proteoforms out of 1692 proteoforms totally identified from RPLC-MS/MS. The clustering patterns reflect stage-dependent alterations in the nanoparticle protein corona. Two representative examples are highlighted: one APOC2 proteoform highly expressed in Grade II, and one APOB proteoform predominantly detected in healthy samples. The peptide-level information from BUP improved or confirmed the localization of modifications on proteoforms.


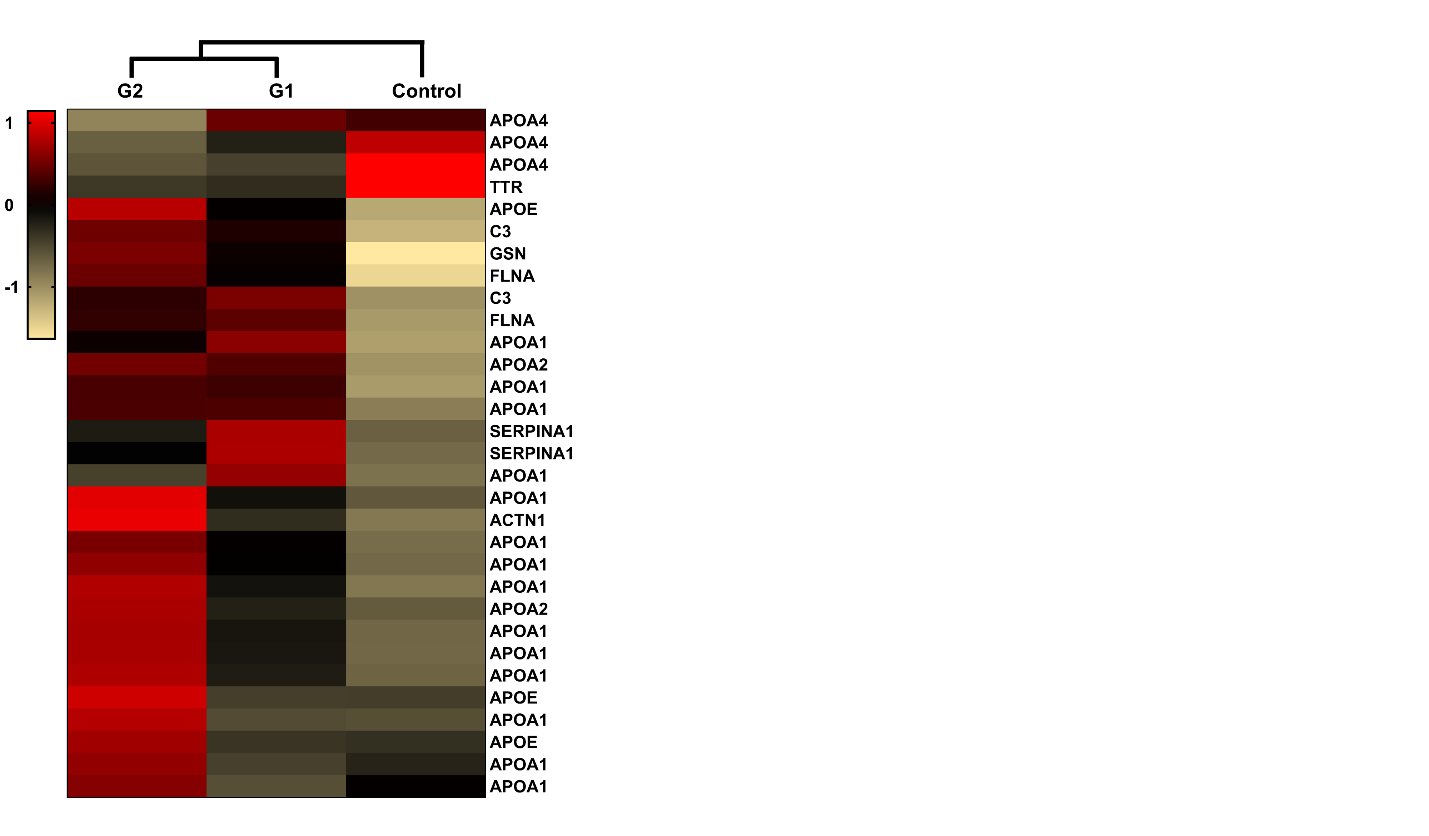


**Figure S6.** Differentially expressed proteoforms identified by CZE–MS/MS. Heatmap and clustering analysis showing differentially expressed proteoforms among the three sample groups (Healthy, Grade I, and Grade II) after normalization and ANOVA test to show statistically significant proteoforms out of 2272 proteoforms totally identified from CZE-MS/MS. The results highlight sample-specific clustering and illustrate stage-dependent changes in the nanoparticle protein corona composition.

**References**

1. Ashkarran, A. A. *et al.* Measurements of heterogeneity in proteomics analysis of the nanoparticle protein corona across core facilities. *Nat Commun* **13**, 6610 (2022).

2. Sadeghi, S. A. *et al.* Mass spectrometry-based top-down proteomics for proteoform profiling of protein coronas. *Nat Protoc* (2025) doi:10.1038/s41596-025-01229-6.

3. Zhu, G., Sun, L. & Dovichi, N. J. Thermally-initiated free radical polymerization for reproducible production of stable linear polyacrylamide coated capillaries, and their application to proteomic analysis using capillary zone electrophoresis-mass spectrometry. *Talanta* **146**, 839–43 (2016).

4. Chen, D., Shen, X. & Sun, L. Capillary zone electrophoresis–mass spectrometry with microliter-scale loading capacity, 140 min separation window and high peak capacity for bottom-up proteomics. *Analyst* **142**, 2118–2127 (2017).

5. Sun, L. *et al.* Ultrasensitive and fast bottom-up analysis of femtogram amounts of complex proteome digests. *Angew Chem Int Ed Engl* **52**, 13661–4 (2013).

6. Jorgenson, J. W. & Lukacs, K. D. Capillary Zone Electrophoresis. *Science (1979)* **222**, 266–272 (1983).

7. Chen, D. *et al.* Recent advances (2019–2021) of capillary electrophoresis‐mass spectrometry for multilevel proteomics. *Mass Spectrom Rev* **42**, 617–642 (2023).

8. Cox, J. & Mann, M. MaxQuant enables high peptide identification rates, individualized p.p.b.-range mass accuracies and proteome-wide protein quantification. *Nat Biotechnol* **26**, 1367–1372 (2008).

9. Kou, Q., Xun, L. & Liu, X. TopPIC: a software tool for top-down mass spectrometry-based proteoform identification and characterization. *Bioinformatics* **32**, 3495–3497 (2016).

10. Kessner, D., Chambers, M., Burke, R., Agus, D. & Mallick, P. ProteoWizard: open source software for rapid proteomics tools development. *Bioinformatics* **24**, 2534–6 (2008).

11. Basharat, A. R., Zang, Y., Sun, L. & Liu, X. TopFD: A Proteoform Feature Detection Tool for Top–Down Proteomics. *Anal Chem* **95**, 8189–8196 (2023).

12. Chen, W., Ding, Z., Zang, Y. & Liu, X. Characterization of Proteoform Post-Translational Modifications by Top-Down and Bottom-Up Mass Spectrometry in Conjunction with Annotations. *J Proteome Res* **22**, 3178–3189 (2023).
